# Supplementary material
Source: Springer Nature journal article supplement (https://www.springermedizin.de/resource/supplementary/12865_2013_576_MOESM1_ESM.pdf/9428276)

# A Non-atopics

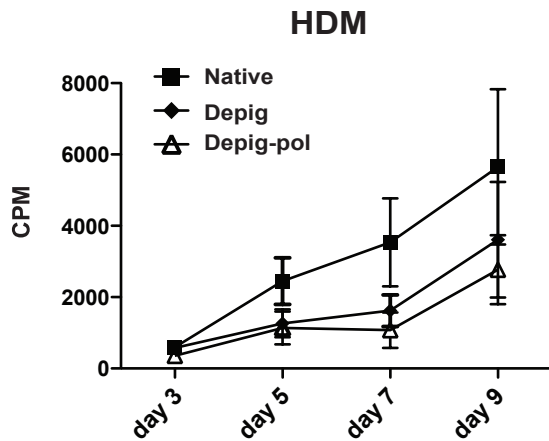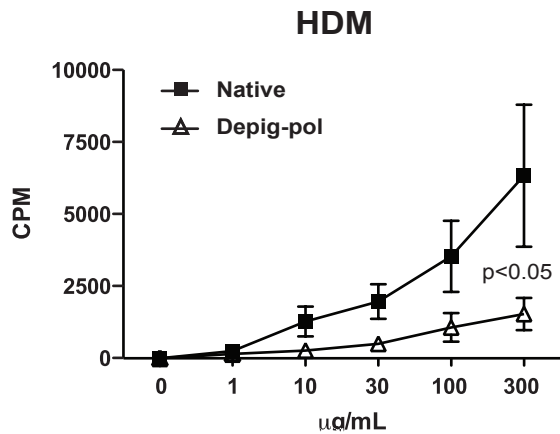

# B Atopics

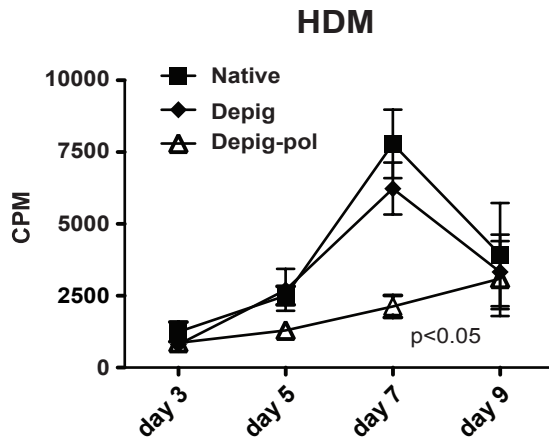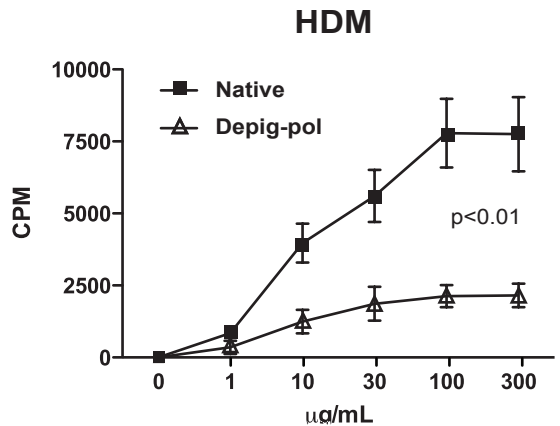

Supplement: MOESM1 [file 9428276]
